# Supplementary material
Source: PubMed Central journal article supplement (PMC3697505)
Supplement: AEM.00515-13_zam999104529so1.pdf [file AEM.00515-13_zam999104529so1.pdf]

**Table S1.** Primers used for qRT-PCR analysis

| <b>Gene</b> | <b>Forward Primer (5' → 3')</b> | <b>Reverse Primer (5' → 3')</b> |
|-------------|---------------------------------|---------------------------------|
| <i>gapA</i> | ggtgttgacgtagtggtgaa            | agcgttgaaacgatgtcctg            |
| <i>proV</i> | ccacaatggtacgccttctca           | gcatgagcgcaaatgactgga           |
| <i>hisD</i> | gaacgtcaactggcggaact            | gtaatcgcacccacaaatcg            |
| <i>fliZ</i> | gctggatatgctacttgacga           | atggctcatctcggtttgttc           |
| <i>ssaG</i> | gtggatatgctctcccacatg           | atcatcgattctgggttgagca          |

**Table S2.** Primers used for mutant construction and deletion confirmation

| <b>Strain</b>                                                                          | <b>Forward Primer (5' → 3')</b>                                                | <b>Reverse Primer (5' → 3')</b>                                                |
|----------------------------------------------------------------------------------------|--------------------------------------------------------------------------------|--------------------------------------------------------------------------------|
| ST4/74 $\Delta$ <i>proP</i> (CFS-0004)<br>(Knock out)                                  | ccagtgcccgccgtatatagcgctac<br>agggcttagcctatgaggacagctgt<br>gtaggctggagctgcttc | atggaggagagtatgcccgcga<br>gagattaagcgaaccttaagcgc<br>gaaatcatatgaatatcctcctta  |
| ST4/74 $\Delta$ <i>proP</i> (CFS-0004)<br>(Knock out confirmation)                     | gtacagtccgtaaccggaca                                                           | acgtcgtgaccacacacatag                                                          |
| ST4/74 $\Delta$ <i>proU</i> ( <i>proVWX</i> ;<br>CFS-0005)<br>(Knock out)              | catgccagaagcaaattcagggtgtg<br>ctcagattctgagtatgttaggggtgtg<br>aggctggagctgcttc | ggccggatagcggcgcgatgaact<br>gcgcttatccggcataaaaaaac<br>gatccatatgaatatcctcctta |
| ST4/74 $\Delta$ <i>proU</i> ( <i>proVWX</i> ;<br>CFS-0005)<br>(Knock out confirmation) | catgtcctacactcaatacga                                                          | gtgatgaatcgtgctgctttgag                                                        |
| ST4/74 $\Delta$ <i>osmU</i> ( <i>osmVWXY</i> ;<br>CFS-0006)<br>(Knock out primers)     | gtaaacaggagtttcaggatagcc<br>tattctgcggggaaatggcgtcaga<br>gtgtaggctggagctgcttc  | cgcgactcttaacgtcgccataac<br>acatgcaaacaggagacacac<br>cgcacatatgaatatcctcctta   |
| ST4/74 $\Delta$ <i>osmU</i> ( <i>osmVWXY</i> ;<br>CFS-0006)                            | gtaagcgtgtaaacgatgca                                                           | atccttcccaacctgttgc                                                            |

CFS-0006)

(Knock out confirmation)

JVS-01028

agatcagaaagccttaacttactggt

tatcttcatagctcaggccatcc

agtgcgctaccagcataaagtggtc

agctcccgtaagggtgattgccata

catatgaatatcctccttag

cggttaggctggagctgcttc

ST4/74  $\Delta rpoE$  (JH3630)

cgccatccatcaaagcgg

ggaccaggctcctggttg

(Knock out confirmation)

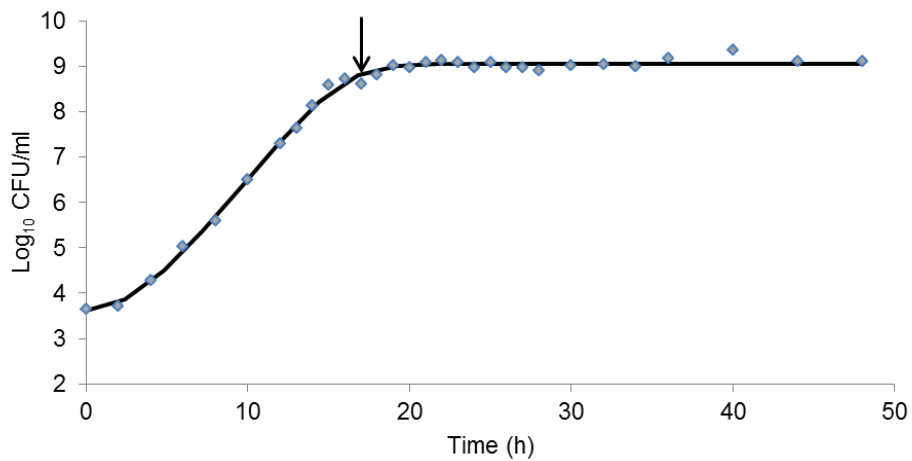

**FIG. S1.** Growth curve of ST4/74 grown statically at 24°C. The arrow indicates the point at which cells were harvested for desiccation onto steel.
